# Supplementary material
Source: Frontiers journal article supplement (https://www.frontiersin.org/articles/469747)
Supplement: Presentation_1.pdf [file Presentation_1.pdf]

## Supplementary Figures

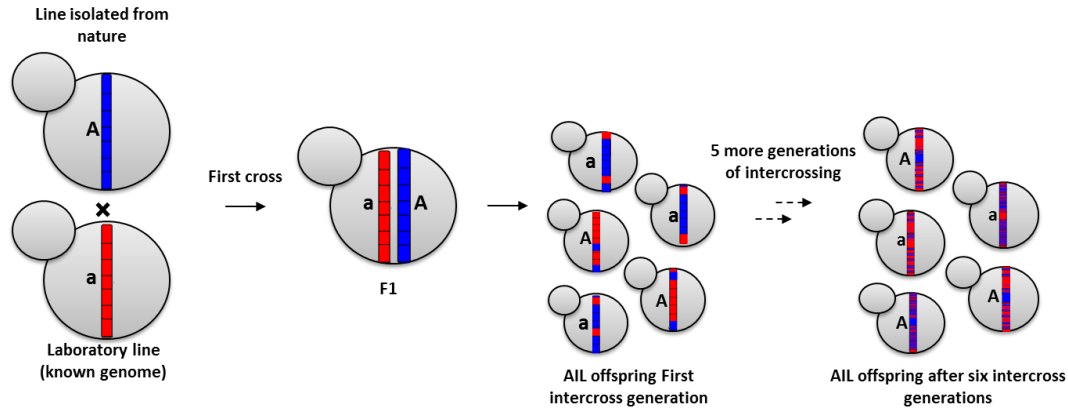

**Supplementary Figure 1.** The AIL scheme for fine mapping. A haploid strain isolated from nature (YE-531) (Ezov et al., 2006) and a laboratory haploid strain (S228c) were crossed to create an F1. The F1 went through EZ ascospore isolation procedure (Bahalul et al., 2010) followed by germination and intercrosses for 5 more generations, creating a mosaic genome. A/a, QTL alleles (Darvasi and Soller, 1995).

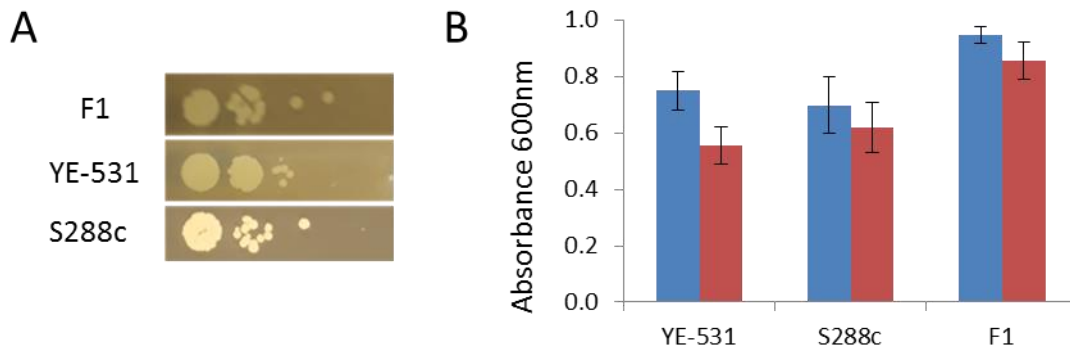

**Supplementary Figure 2.** Ethanol tolerance of parental lines. (A) Survival of parental lines and the F1 in the presence of ethanol. Cells from each strain were incubated in YPD medium in 19% (V/V) ethanol at 30°C for 5 hours, in anaerobic conditions. Each drop was seeded in spot assay at 1 to 100,000 fold dilution. The process was done in 4 biological repeats. (B) Growth ability of parental lines and the F1 in the presence of 9.5% (V/V) ethanol (Blue) and 10.8% (V/V) ethanol (red). Cells from each strain, in equal concentrations, were grown in YPD medium with ethanol content at 30°C for 22 hours, in anaerobic condition. Final 600nm absorbance was measured. The mean values and SD are presented.

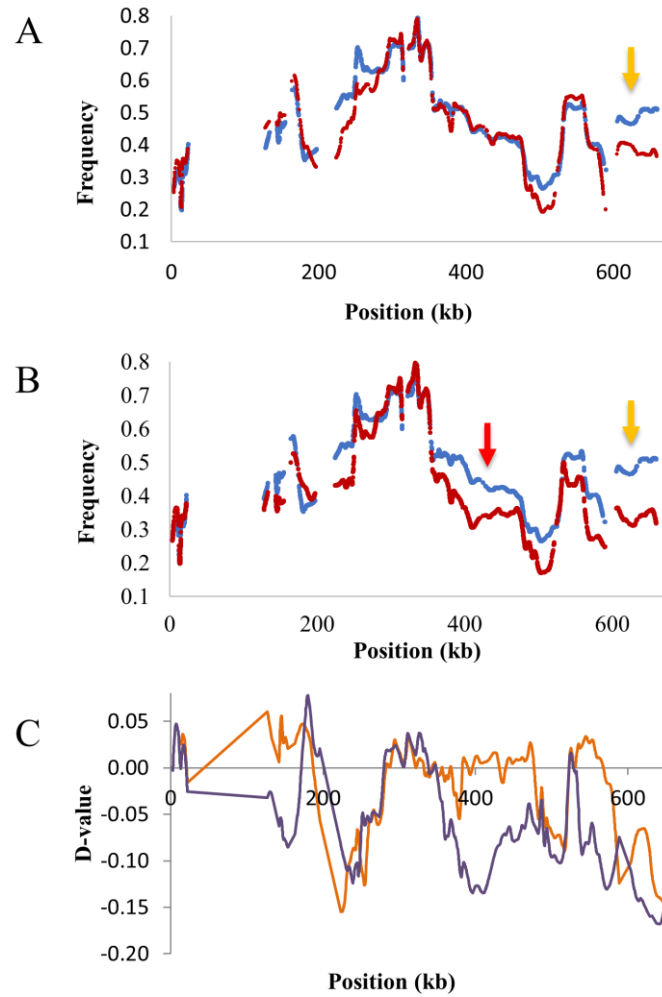

**Supplementary Figure 3.** Smoothed mean SNP Allele frequency and D-values on chromosome 11. Average frequency of YE-531 allele of the 3 replicates of a group, after LOESS smoothing. Blue: F6 (the same control groups were used for both traits); Red: upper tail; (A) Growth; (B) Survival. Some regions show large differences between the allele frequencies of tails and controls (arrows: Red arrow, significant region only for survival; orange arrows, significant region for both traits). (C) The allele frequency difference between the tail groups and the F6 (D-values). Orange: growth; Purple: survival.

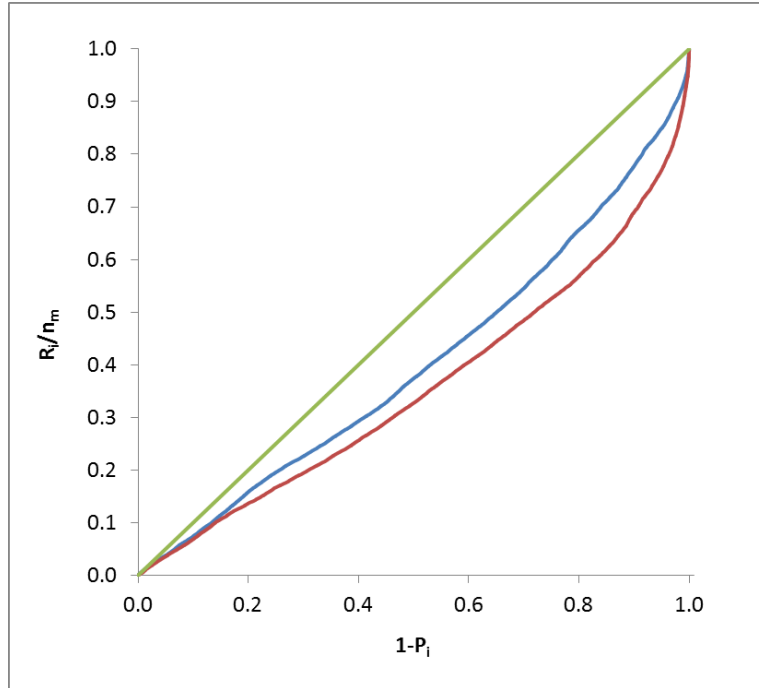

**Supplementary Figure 4.** Schweder-Spjøtvoll plot (Spjøtvoll, 1982) for P-values after LOESS smoothing. Values of  $1-P_i$  were sorted in ascending order. Then  $R_i/n_m$ , the rank number of the  $i^{\text{th}}$  marker divided by the total number of marker tests ( $n_m$ ), was plotted against the sorted  $1-P_i$  values. Green, expected 45° regression line, the expectation if all marker-tests were under the null-hypothesis; Blue and red, the actual results of Growth and Survival. The slopes of the curves are distinctly less than 45° in the first half of the chart (small  $1-P_i$  = large  $P_i$ ), reflecting a deficiency of true null-hypotheses in the dataset. On the other hand, the slopes of the curves are distinctly greater than 45° toward the right hand side of the chart (small  $P_i$ ), reflecting a large number of rejected null-hypotheses (true, significant QTL effects). The greater concavity of the survival curve indicates a larger number of significant markers. As shown, the regression lines may be used to estimate the number of true null hypotheses (Spjøtvoll, 1982; Lipkin et al., 2016).

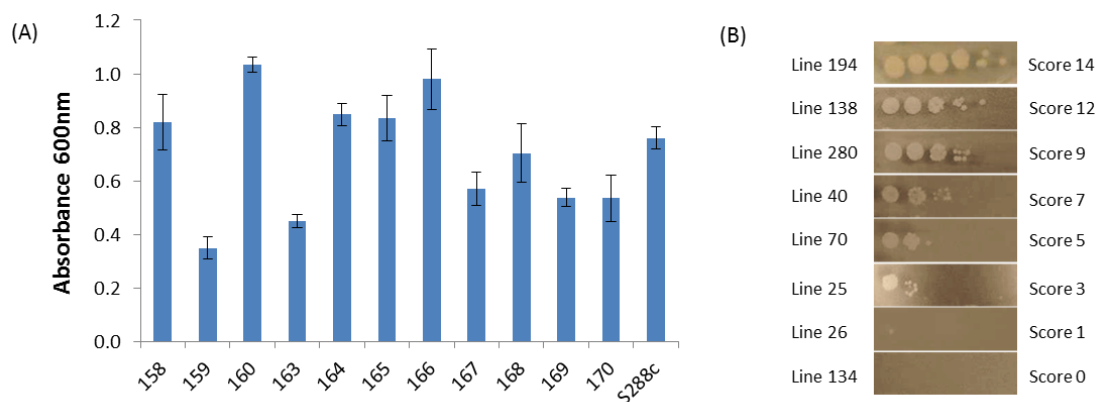

**Supplementary Figure 5.** An example of ethanol tolerance of the segregants. (A) Growth ability of 11 segregants (out of 300 tested) and the founder S288c in 9.5% (V/V) ethanol. Cells were grown in YPD medium with ethanol at 30°C for 20 hours, in anaerobic conditions. Final 600nm absorbance was measured. The mean values and SD are presented. (B) Survival test of 8 segregants (out of 300 tested) in the presence of 19% (V/V) ethanol for 5 hours. Cells in equal concentrations were incubated in YPD medium with ethanol at 30°C for 5 hours, in anaerobic conditions. Samples were seeded at 1 to 100,000-fold dilutions. Survival score (0-14) was assigned depending on the final dilution showing survival in the spot assay (see examples on the right).

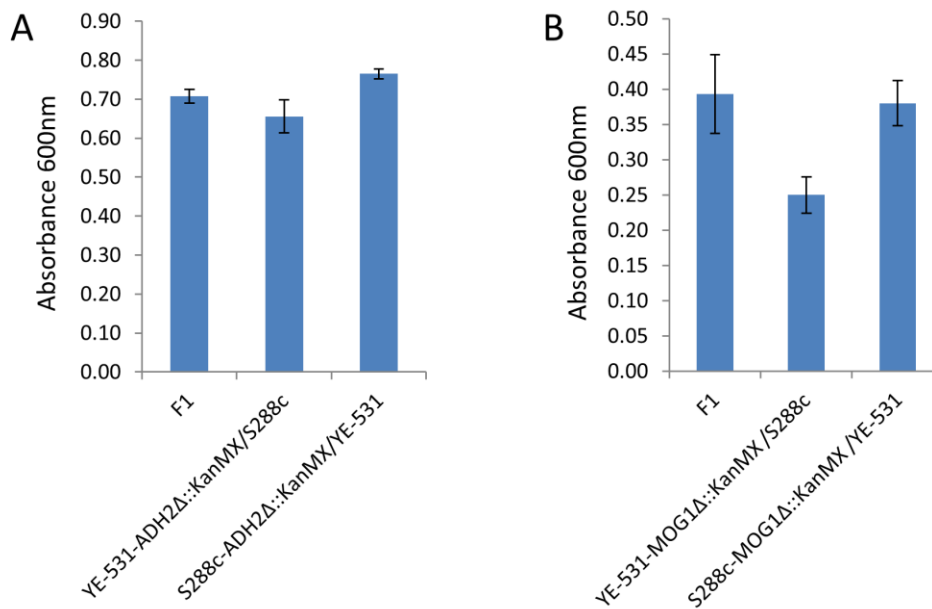

**Supplementary Figure 6.** Reciprocal hemizygosity analysis confirms the contribution of *ADH2* and *MOG1* to ethanol tolerance trait. Growth ability tests under ethanol stress (left, 10%; right, 11%) of F1 and *ADH2/MOG1* reciprocal hemizygous deletions. The mean values of 4 repeats in a single batch and the SD are presented. See tests for statistical significance, based on two batches, in Supplementary Table 9. (A) *ADH2* gene contributes to ethanol tolerance trait. The effect was small, as might be expected for effect of a single gene only, but in the correct direction and statistically significant (Supplementary Table 9). (B) *MOG1* gene contributes to ethanol tolerance trait. F1 hybrids were individually deleted for the *ADH2* and *MOG1* alleles. In both cases, the deletion of S288c-alleles in the background of the F1 strain resulted in a better growth ability than of the deletion of YE-531-alleles (YE-531-allele increase ethanol tolerance).

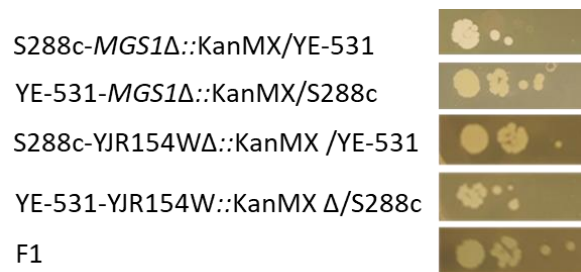

**Supplementary Figure 7.** Reciprocal hemizygosity analysis confirms the contribution of *YJR154W* and *MGS1* to ethanol survival trait. Survival ability tests of reciprocal hemizygous deletions, was tested under ethanol stress (19%(V/V)). In the background of the F1 strain, the deletion of YE-531-allele (and expression of the S288c allele) resulted in a better survival ability than of the deletion of S288c allele for *MGS1* (and expression of the YE-531 allele). Thus, YE-531-allele increased ethanol tolerance). The opposite was obtained for *YJR154W*, as in this case YE-531-allele increased ethanol tolerance.

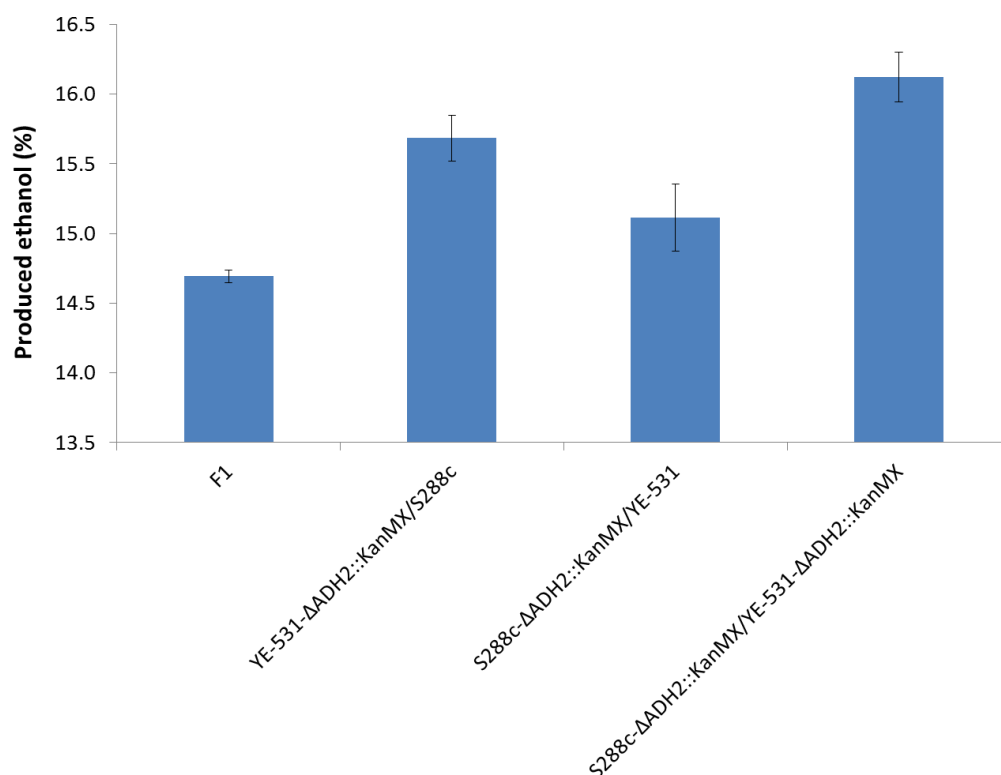

**Supplementary Figure 8.** Improved ethanol production by *ADH2* deletion strains in accordance to RHA. Shown is average ethanol production of the F1, *ADH2* reciprocal hemizygous deletions, and a double deletion strain in the F1 background, after 17 fermentation hours. Results are the average of 2 biological replicates (for each one 2 technical repeats). Fermentations were conducted using corn mash at 32.5°C and 160 rpm agitation, under anaerobic conditions, with initial cell concentration of  $10^7$  cells/ml.

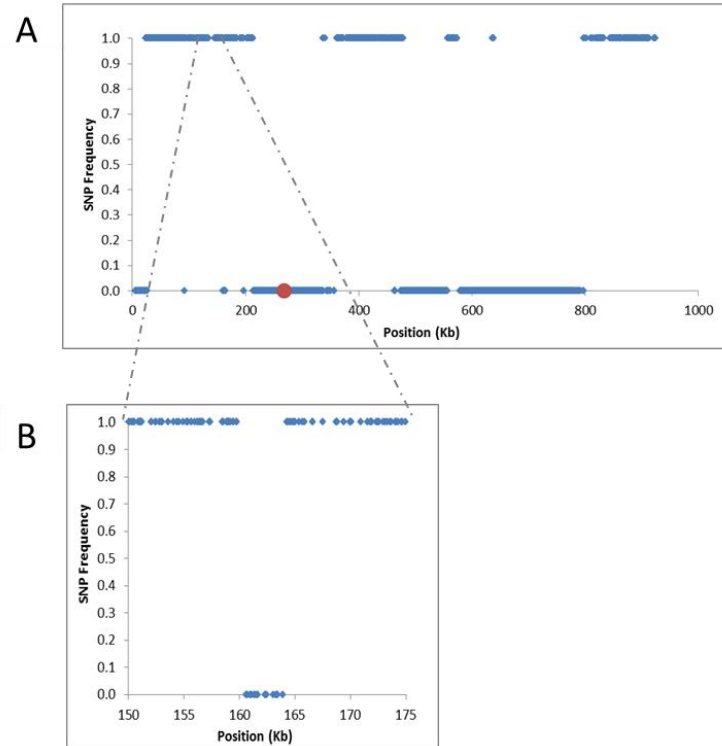

**Supplementary Figure 9.** Recombination block structure and frequency distribution of parental line alleles. (A) Origin of founder SNPs across chromosome 13 of Line-8, an individual F6 haploid segregant. Sequences were aligned to the reference S288c genome sequence. Thus, SNP frequencies 0 or 1 indicate an S288c or YE-531 allele, respectively. Red circle, centromere; (B) Zoom-in on a small haplotype block of size 4,554 bp.

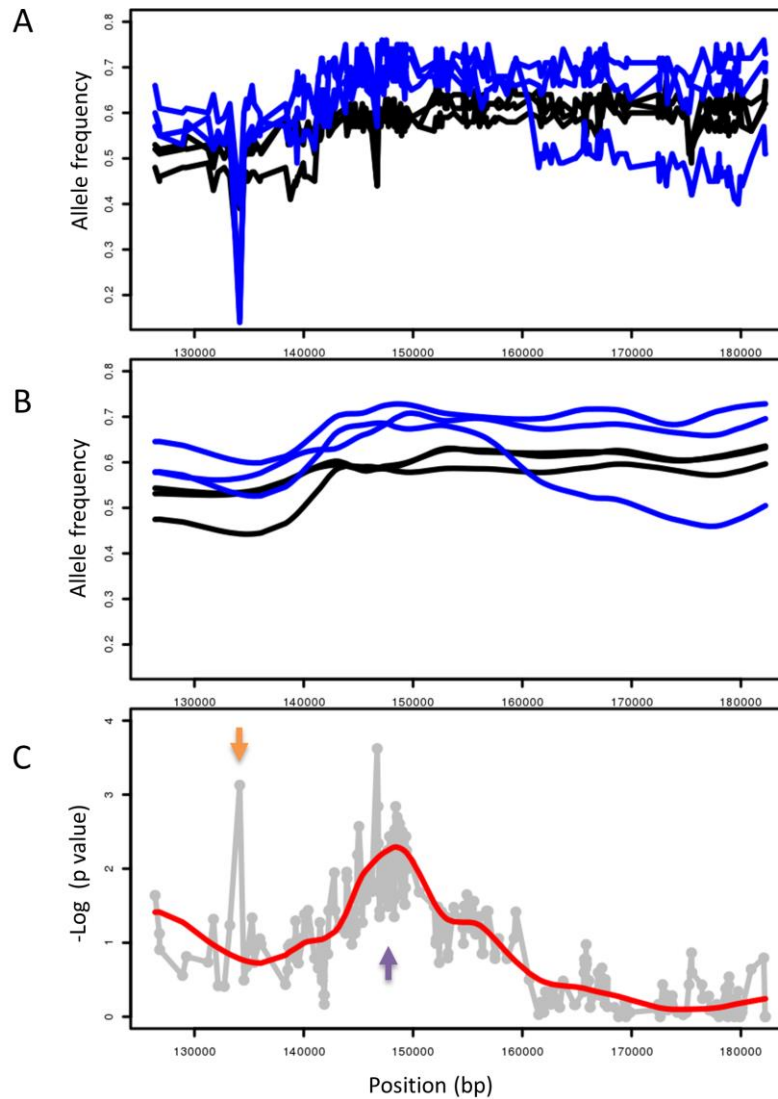

**Supplementary Figure 10.** Example for LOESS smoothing effect on allele frequencies (chromosome 8 for growth trait). Blue, resistant pools; Black, Control pools. (A) Raw allele frequencies show a large background noise. (B) Improved smoothed frequencies consistency due to LOESS smoothing. (C) Results significance is affected by LOESS smoothing. Orange arrow, false positives are reduced; Purple arrow, clarification of a peak shape after LOESS.



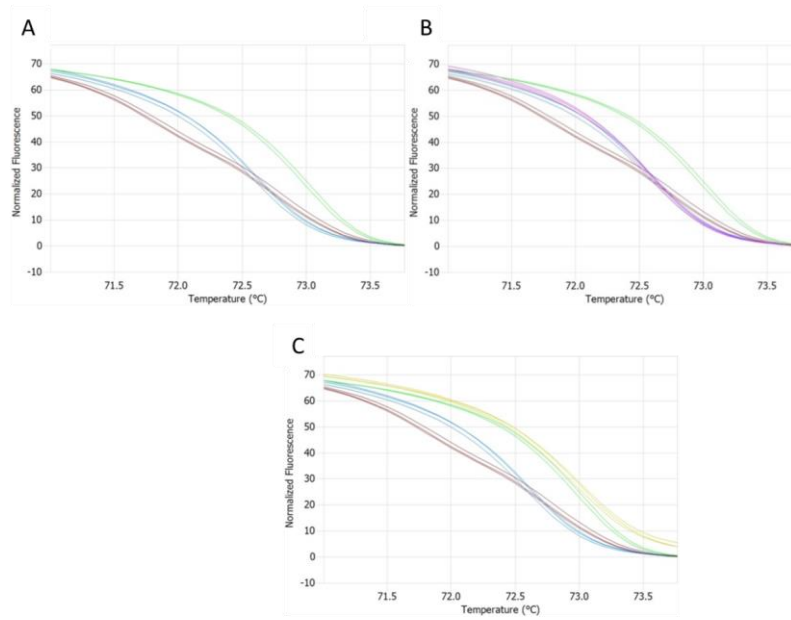

**Supplementary Figure 11.** Individual frequency estimates of a tested SNP by real time PCR coupled to High Resolution Melting (HRM) genotyping. The charts are focused on the  $T_m$  area for a SNP located in the gene UPT20 on chromosome 2 position 228,251 (examined for 30 individuals which composed one of the survival upper tail group and 30 random segregants of the entire F6 population) (A) HRM results for S288c (blue), YE-531 (green) and a mix of both (brown). (B) HRM results for S288c (blue), YE-531 (green) mix of both of them (brown) and segregant YE-159 having the allele of S288c (pink). (C) HRM results for S288c (blue), YE-531 (green) mix of both (brown) and one of the segregant YE-270 having the allele of YE-531 (yellow).

## Supplementary Tables

**Supplementary Table 1** full sequence identifiers of the genome sequences and the strains description that were used for the tree building in fig. 1

| <b>Name</b> | <b>Full sequence identifiers</b>     | <b>Description</b>                           |
|-------------|--------------------------------------|----------------------------------------------|
| CLIB324     | CLIB324_WashU_2011_AEWM01000000      | Vietnamese bakery isolate                    |
| D273-10B    | D273-10B_Stanford_2014_JRIY00000000  | Laboratory strain                            |
| DBVPG6044   | DBVPG6044_Stanford_2014_JRIG00000000 | Derivative of West African bili wine isolate |
| EC9-8       | EC9-8_ASinica_2011_AGSJ01000000      | Haploid derivative of Israeli canyon isolate |
| FL100       | FL100_Stanford_2014_JRIT00000000     | Laboratory strain                            |
| K11         | K11_Stanford_2014_JRIJ00000000       | Japanese sake yeast                          |
| L1528       | L1528_Stanford_2014_JRIK00000000     | Chilean red wine isolate                     |
| RedStar     | RedStar_Stanford_2014_JRIL00000000   | Commercial baking yeast                      |
| RM11-1A     | RM11-1A_SGD_2015_JRIP00000000        | Derivative of California Zinfandel vineyard  |
| S288C       | S288C_reference_sequence_R64-2-1     | Laboratory strain                            |
| T73         | T73_WashU_2011_AFD01000000           | Spanish red wine strain                      |
| Vin13       | Vin13_AWRI_2010_ADXC01000000         | South African white wine                     |
| YPS128      | YPS128_Stanford_2014_JRID00000000    | Pennsylvania woodland isolate                |
| YS9         | YS9_Stanford_2014_JRIB00000000       | Singaporean commercial baking strain         |

**Supplementary Table 2.** Distribution of YE-531 SNP allele frequencies in the F6 population

| Frequency    | N      | Proportion |
|--------------|--------|------------|
| 0.0-0.1      | 292    | 0.008      |
| >0.1-0.2     | 1,408  | 0.040      |
| >0.2-0.3     | 3,726  | 0.106      |
| >0.3-0.4     | 6,375  | 0.181      |
| >0.4-0.5     | 6,753  | 0.192      |
| >0.5-0.6     | 5,894  | 0.168      |
| >0.6-0.7     | 5,527  | 0.157      |
| >0.7-0.8     | 3,968  | 0.113      |
| >0.8-0.9     | 1,134  | 0.032      |
| >0.9-1.0     | 57     | 0.002      |
| F $\leq$ 0.5 | 18,554 | 0.528      |
| Sum          | 35,134 | 1.000      |

Frequency, range of frequencies; N, number of markers having frequency of the YE-531 allele in this range; Proportion, proportion of the markers in this range among all 35,134 markers; F $\leq$ 0.5, proportion of all markers having this frequency among all markers.

**Supplementary Table 3.** Distribution of D-values before and after LOESS

|                            | Before LOESS |            |          |            | After LOESS |            |          |            |
|----------------------------|--------------|------------|----------|------------|-------------|------------|----------|------------|
|                            | Growth       |            | Survival |            | Growth      |            | Survival |            |
|                            | N            | Proportion | N        | Proportion | N           | Proportion | N        | Proportion |
| >-0.4 - -0.3               | 1            | 0.00003    | 2        | 0.00006    | 0           | 0.00000    | 0        | 0.00000    |
| >-0.3 - -0.2               | 41           | 0.00114    | 48       | 0.00134    | 2           | 0.00006    | 39       | 0.00111    |
| >-0.2 - -0.1               | 1,577        | 0.04401    | 2,550    | 0.07116    | 727         | 0.02069    | 2,640    | 0.07539    |
| >-0.1 - 0.0                | 16,127       | 0.45005    | 16,030   | 0.44734    | 17,649      | 0.50233    | 14,360   | 0.41006    |
| >0.0 - 0.1                 | 17,063       | 0.47617    | 14,340   | 0.40018    | 15,481      | 0.44063    | 15,923   | 0.45470    |
| >0.1 - 0.2                 | 1,001        | 0.02793    | 2,798    | 0.07808    | 1,272       | 0.03620    | 2,056    | 0.05871    |
| >0.2 - 0.3                 | 14           | 0.00039    | 62       | 0.00173    | 1           | 0.00003    | 1        | 0.00003    |
| >0.3 - 0.4                 | 7            | 0.00020    | 2        | 0.00006    | 1           | 0.00003    |          | 0.00000    |
| >0.4 - 0.5                 | 1            | 0.00003    | 1        | 0.00003    | 1           | 0.00003    |          | 0.00000    |
| >0.5 - 0.6                 | 1            | 0.00003    |          | 0.00000    |             | 0.00000    |          | 0.00000    |
| >0.6 - 0.7                 | 1            | 0.00003    | 1        | 0.00003    |             | 0.00000    |          | 0.00000    |
| <b>D<math>\leq</math>0</b> | 17,746       | 0.49523    | 18,630   | 0.51990    | 18,378      | 0.52308    | 17,039   | 0.48656    |
| <b>D&gt;0</b>              | 18,088       | 0.50477    | 17,204   | 0.48010    | 16,756      | 0.47692    | 17,980   | 0.51344    |
| <b>Total</b>               | 35,834       | 1.00000    | 35,834   | 1.00000    | 35,134      | 1.00000    | 35,019   | 1.00000    |

<sup>1</sup>N, number of markers having D-values in this range; Proportion, proportion of the markers in this range among all markers.

<sup>2</sup>D-value was defined as the allele frequency difference between the mean of the three tail groups and the mean of the three control groups for each trait. After LOESS, 94% of D-values were in the range -0.1 to 0.1 for growth, and 86% were in this range for survival.

**Supplementary Table 4.** Distribution of marker P-values

| <b>P-value</b> | <b>Proportion</b> |                 |
|----------------|-------------------|-----------------|
|                | <b>Growth</b>     | <b>Survival</b> |
| ≤0.1           | 0.223             | 0.310           |
| >0.1 - 0.2     | 0.121             | 0.122           |
| >0.2 - 0.3     | 0.111             | 0.084           |
| >0.3 - 0.4     | 0.089             | 0.079           |
| >0.4 - 0.5     | 0.082             | 0.078           |
| >0.5 - 0.6     | 0.081             | 0.071           |
| >0.6 - 0.7     | 0.067             | 0.062           |
| >0.7 - 0.8     | 0.068             | 0.057           |
| >0.8 - 0.9     | 0.084             | 0.068           |
| >0.9 - 1.0     | 0.074             | 0.068           |
| Total          | 35,134            | 35,019          |

<sup>1</sup>Presented are the nominal P-values. To define QTLs we used FDR cutoff and chose the critical threshold P-values accordingly.

<sup>2</sup>Proportion, proportion of the markers in this range among all markers.

**Supplementary Table 5.** Distribution of QTLs and positive alleles across the genome

(A) Growth

| Chr | N  | Proportion | S288c | YE-531 |
|-----|----|------------|-------|--------|
| 1   | 0  | -          | -     | -      |
| 2   | 3  | 0.0588     | 1     | 2      |
| 3   | 2  | 0.0392     | 2     | 0      |
| 4   | 3  | 0.0588     | -     | 3      |
| 5   | 0  | -          | -     | -      |
| 6   | 1  | 0.0196     | 0     | 1      |
| 7   | 6  | 0.1176     | 2     | 4      |
| 8   | 4  | 0.0784     | 2     | 2      |
| 9   | 2  | 0.0392     | -     | 2      |
| 10  | 3  | 0.0588     | 1     | 2      |
| 11  | 5  | 0.0980     | 5     | -      |
| 12  | 1  | 0.0196     | 1     | -      |
| 13  | 4  | 0.0784     | 1     | 3      |
| 14  | 4  | 0.0784     | 2     | 2      |
| 15  | 5  | 0.0980     | 3     | 2      |
| 16  | 8  | 0.1569     | 4     | 4      |
| Sum | 51 | 1.0000     | 24    | 27     |

(B) Survival

| Chr | N  | Proportion | S288c | YE-531 |
|-----|----|------------|-------|--------|
| 1   | 0  | 0.0000     | 0     | 0      |
| 2   | 8  | 0.0833     | 3     | 5      |
| 3   | 4  | 0.0417     | 0     | 4      |
| 4   | 9  | 0.0938     | 2     | 7      |
| 5   | 8  | 0.0833     | 8     | 0      |
| 6   | 1  | 0.0104     | 0     | 1      |
| 7   | 9  | 0.0938     | 6     | 3      |
| 8   | 7  | 0.0729     | 5     | 2      |
| 9   | 4  | 0.0417     | 1     | 3      |
| 10  | 5  | 0.0521     | 4     | 1      |
| 11  | 8  | 0.0833     | 8     | 0      |
| 12  | 7  | 0.0729     | 5     | 2      |
| 13  | 6  | 0.0625     | 0     | 6      |
| 14  | 6  | 0.0625     | 1     | 5      |
| 15  | 2  | 0.0208     | 1     | 1      |
| 16  | 12 | 0.1250     | 3     | 9      |
| Sum | 96 | 1          | 49    | 47     |

Proportion is proportion of QTL on given chromosome out of all mapped QTL by trait.

**Supplementary Table 6.** Overall distribution by traits of significant SNPs and indels among QTLs, ORFs and regulatory sites

|                         | Content          | Growth | Survival |
|-------------------------|------------------|--------|----------|
| <b>QTL</b>              | SNPs             | 3,592  | 7,204    |
|                         | Indels           | 351    | 732      |
|                         | ORFs             | 311    | 614      |
|                         | Regulatory sites | 81     | 145      |
| <b>ORF</b>              | Indels           | 57     | 112      |
|                         | Syn SNPs         | 1,073  | 2,055    |
|                         | Non-Syn SNPs     | 616    | 1,167    |
| <b>Regulatory sites</b> | Indels           | 19     | 23       |
|                         | SNPs             | 62     | 122      |

Syn SNPs, SNPs resulting in synonymous nucleotide substitutions; Non-Syn SNPs, SNPs resulting in nonsynonymous substitutions. Only SNPs used for QTL mapping are included.

**Supplementary Table 7.** Distribution of QTL according to number of ORFs within the QTL

| ORF/QT<br>L | Survival |            | Growth |            |
|-------------|----------|------------|--------|------------|
|             | N        | Proportion | N      | Proportion |
| 0           | 3        | 0.031      | 2      | 0.039      |
| 1           | 10       | 0.104      | 5      | 0.098      |
| 2           | 5        | 0.052      | 3      | 0.059      |
| 3           | 9        | 0.094      | 4      | 0.078      |
| 4           | 11       | 0.115      | 6      | 0.118      |
| 5           | 9        | 0.094      | 6      | 0.118      |
| 6-10        | 33       | 0.104      | 22     | 0.157      |
| 11-20       | 13       | 0.094      | 1      | 0.078      |
| >20         | 3        | 0.042      | 2      | 0.098      |
| Total       | 96       | 1.000      | 51     | 1.000      |

**Supplementary Table 8.** QTL allele effect ( $\delta$ ) and contribution to the phenotypic variance (cP)

(A) Growth (OD units at 600 nm)

| Chr | QTL | $\delta$ | cP    | Chr | QTL | $\delta$ | cP    | Chr   | QTL | $\delta$ | cP    |
|-----|-----|----------|-------|-----|-----|----------|-------|-------|-----|----------|-------|
| 2   | 1   | 0.034    | 0.020 | 8   | 18  | 0.044    | 0.031 | 14    | 35  | 0.019    | 0.006 |
| 2   | 2   | 0.021    | 0.007 | 8   | 19  | 0.015    | 0.005 | 14    | 36  | 0.019    | 0.003 |
| 2   | 3   | 0.021    | 0.005 | 9   | 20  | 0.015    | 0.005 | 14    | 37  | 0.013    | 0.003 |
| 3   | 4   | 0.012    | 0.003 | 9   | 21  | 0.012    | 0.003 | 14    | 38  | 0.022    | 0.009 |
| 3   | 5   | 0.014    | 0.004 | 10  | 22  | 0.018    | 0.006 | 15    | 39  | 0.017    | 0.007 |
| 4   | 6   | 0.013    | 0.004 | 10  | 23  | 0.021    | 0.007 | 15    | 40  | 0.015    | 0.004 |
| 4   | 7   | 0.015    | 0.004 | 10  | 24  | 0.014    | 0.003 | 15    | 41  | 0.013    | 0.004 |
| 4   | 8   | 0.021    | 0.008 | 11  | 25  | 0.020    | 0.009 | 15    | 42  | 0.014    | 0.004 |
| 6   | 9   | 0.027    | 0.016 | 11  | 26  | 0.017    | 0.006 | 15    | 43  | 0.019    | 0.007 |
| 7   | 10  | 0.015    | 0.005 | 11  | 27  | 0.015    | 0.004 | 16    | 44  | 0.019    | 0.008 |
| 7   | 11  | 0.025    | 0.010 | 11  | 28  | 0.020    | 0.008 | 16    | 45  | 0.015    | 0.005 |
| 7   | 12  | 0.017    | 0.005 | 11  | 29  | 0.019    | 0.008 | 16    | 46  | 0.013    | 0.004 |
| 7   | 13  | 0.014    | 0.004 | 12  | 30  | 0.014    | 0.003 | 16    | 47  | 0.012    | 0.003 |
| 7   | 14  | 0.019    | 0.008 | 13  | 31  | 0.020    | 0.009 | 16    | 48  | 0.013    | 0.004 |
| 7   | 15  | 0.015    | 0.005 | 13  | 32  | 0.017    | 0.006 | 16    | 49  | 0.016    | 0.004 |
| 8   | 16  | 0.019    | 0.007 | 13  | 33  | 0.016    | 0.005 | 16    | 50  | 0.013    | 0.003 |
| 8   | 17  | 0.037    | 0.025 | 13  | 34  | 0.020    | 0.009 | 16    | 51  | 0.014    | 0.004 |
|     |     |          |       |     |     |          |       | Avg   |     | 0.018    | 0.007 |
|     |     |          |       |     |     |          |       | Total |     |          | 0.347 |

## (B) Survival (survival trait units)

| Chr   | QTL | $\delta$ | cP    | Chr   | QTL | $\delta$ | cP    | Chr | QTL | $\delta$ | cP    |
|-------|-----|----------|-------|-------|-----|----------|-------|-----|-----|----------|-------|
| 2     | 1   | 0.244    | 0.003 | 7     | 33  | 0.334    | 0.006 | 12  | 65  | 0.309    | 0.006 |
| 2     | 2   | 0.584    | 0.017 | 7     | 34  | 0.561    | 0.010 | 12  | 66  | 0.251    | 0.004 |
| 2     | 3   | 0.480    | 0.006 | 7     | 35  | 0.279    | 0.005 | 12  | 67  | 0.479    | 0.009 |
| 2     | 4   | 0.436    | 0.006 | 7     | 36  | 0.337    | 0.007 | 12  | 68  | 0.353    | 0.006 |
| 2     | 5   | 0.460    | 0.009 | 7     | 37  | 0.269    | 0.005 | 12  | 69  | 0.328    | 0.005 |
| 2     | 6   | 0.489    | 0.010 | 7     | 38  | 0.320    | 0.006 | 12  | 70  | 0.373    | 0.006 |
| 2     | 7   | 0.405    | 0.007 | 7     | 39  | 0.286    | 0.005 | 13  | 71  | 0.287    | 0.005 |
| 2     | 8   | 0.550    | 0.012 | 8     | 40  | 0.423    | 0.011 | 13  | 72  | 0.415    | 0.010 |
| 3     | 9   | 0.337    | 0.006 | 8     | 41  | 0.452    | 0.013 | 13  | 73  | 0.258    | 0.004 |
| 3     | 10  | 0.335    | 0.005 | 8     | 42  | 0.296    | 0.006 | 13  | 74  | 0.254    | 0.004 |
| 3     | 11  | 0.377    | 0.009 | 8     | 43  | 0.794    | 0.033 | 13  | 75  | 0.413    | 0.009 |
| 3     | 12  | 0.455    | 0.012 | 8     | 44  | 0.376    | 0.007 | 13  | 76  | 0.253    | 0.004 |
| 4     | 13  | 0.284    | 0.005 | 8     | 45  | 0.240    | 0.004 | 14  | 77  | 0.576    | 0.006 |
| 4     | 14  | 0.231    | 0.003 | 8     | 46  | 0.246    | 0.004 | 14  | 78  | 0.693    | 0.013 |
| 4     | 15  | 0.316    | 0.006 | 9     | 47  | 0.249    | 0.004 | 14  | 79  | 0.265    | 0.004 |
| 4     | 16  | 0.364    | 0.009 | 9     | 48  | 0.234    | 0.003 | 14  | 80  | 0.250    | 0.004 |
| 4     | 17  | 0.274    | 0.005 | 9     | 49  | 0.303    | 0.006 | 14  | 81  | 0.313    | 0.006 |
| 4     | 18  | 0.294    | 0.005 | 9     | 50  | 0.412    | 0.011 | 14  | 82  | 0.207    | 0.003 |
| 4     | 19  | 0.294    | 0.005 | 10    | 51  | 0.415    | 0.011 | 15  | 83  | 0.308    | 0.005 |
| 4     | 20  | 0.274    | 0.004 | 10    | 52  | 0.247    | 0.004 | 15  | 84  | 0.311    | 0.006 |
| 4     | 21  | 0.550    | 0.017 | 10    | 53  | 0.297    | 0.006 | 16  | 85  | 0.277    | 0.005 |
| 5     | 22  | 0.301    | 0.005 | 10    | 54  | 0.309    | 0.006 | 16  | 86  | 0.403    | 0.010 |
| 5     | 23  | 0.358    | 0.008 | 10    | 55  | 0.418    | 0.008 | 16  | 87  | 0.388    | 0.010 |
| 5     | 24  | 0.347    | 0.008 | 11    | 56  | 0.341    | 0.008 | 16  | 88  | 0.336    | 0.005 |
| 5     | 25  | 0.372    | 0.009 | 11    | 57  | 0.391    | 0.010 | 16  | 89  | 0.301    | 0.006 |
| 5     | 26  | 0.281    | 0.005 | 11    | 58  | 0.299    | 0.005 | 16  | 90  | 0.426    | 0.012 |
| 5     | 27  | 0.281    | 0.005 | 11    | 59  | 0.387    | 0.008 | 16  | 91  | 0.356    | 0.008 |
| 5     | 28  | 0.285    | 0.005 | 11    | 60  | 0.258    | 0.004 | 16  | 92  | 0.303    | 0.006 |
| 5     | 29  | 0.351    | 0.007 | 11    | 61  | 0.260    | 0.004 | 16  | 93  | 0.424    | 0.011 |
| 6     | 30  | 0.564    | 0.020 | 11    | 62  | 0.394    | 0.010 | 16  | 94  | 0.267    | 0.005 |
| 7     | 31  | 0.264    | 0.004 | 11    | 63  | 0.525    | 0.018 | 16  | 95  | 0.551    | 0.018 |
| 7     | 32  | 0.274    | 0.005 | 12    | 64  | 0.441    | 0.011 | 16  | 96  | 0.266    | 0.004 |
| Avg   |     |          | 0.357 | 0.008 |     |          |       |     |     |          |       |
| Total |     |          |       | 0.720 |     |          |       |     |     |          |       |

$\delta$ , allele effect; cP, the contribution of the QTL to the phenotypic variance.

**Supplementary Table 9.** Comparison of QTL and RHA effects

| Gene        | Standard name | Trait | Favor QTL allele | RHA Allele effect                    | Favor RHA allele                     | P      | Sign   |    |
|-------------|---------------|-------|------------------|--------------------------------------|--------------------------------------|--------|--------|----|
|             |               |       |                  | S288c-<br>$\Delta::kanMX/$<br>YE-531 | YE-531-<br>$\Delta::kanMX/$<br>S288c |        |        |    |
| <i>ADH2</i> | YMR303C       | G     | YE-531           | 0.594                                | 0.500                                | YE-531 | 0.010  | +  |
| <i>MOG1</i> | YJR074W       | G     | YE-531           | 0.521                                | 0.433                                | YE-531 | 0.0020 | +  |
| None        | YJR154W       | G     | YE-531           | 0.649                                | 0.636                                | YE-531 | 0.38   | +  |
| <i>RTG2</i> | YGL252C       | G     | S288c            | 0.819                                | 0.830                                | S288c  | 0.42   | +  |
| <i>MGS1</i> | YNL218W       | S     | S288c            | 1.073                                | 1.135                                | S288c  | 0.0060 | +  |
| <i>ZRT1</i> | YGL255W       | S     | S288c            | 1.250                                | 1.313                                | S288c  | 0.40   | +  |
| <i>NTH2</i> | YBR001C       | S     | S288c            | 0.986                                | 0.986                                | EQUAL  | 0.19   | NI |
| <i>MMP1</i> | YLL061W       | S     | S288c            | 1.010                                | 1.063                                | S288c  | 0.18   | +  |
| None        | YJR154W       | S     | YE-531           | 0.992                                | 0.767                                | YE-531 | 0      | +  |
| <i>ADH2</i> | YMR303C       | S     | YE-531           | 1.104                                | 1.083                                | YE-531 | 0.20   | +  |

G, growth; S, survival; RHA Allele effect, average effect; P, CWER p-value by ANOVA (growth trait) or nonparametric ANCOVA (survival). Sign: +, QTL mapping and RHA agree on favorable allele; -, QTL and RHA disagree; EQUAL, the two alleles have exactly the same effect on RHA; NI, comparison is not informative for sign test.

**Supplementary Table 10.** Recombination block size distribution across the entire genome of one random F6 individual, Line-8

| haplotype size (Kb) | N              | %     |
|---------------------|----------------|-------|
| 0.01-0.10           | 3              | 1.43  |
| 0.1-1.00            | 22             | 10.48 |
| 1-5                 | 48             | 22.86 |
| 5-10                | 20             | 9.52  |
| 10-100              | 77             | 36.67 |
| 100-1,000           | 40             | 19.05 |
| <b>Total</b>        | <b>210</b>     |       |
| <b>Median</b>       | <b>16.1 Kb</b> |       |



**Supplementary Table 11.** Sequencing coverage of analyzed pool replicates

| Sample                         | Coverage of reads |
|--------------------------------|-------------------|
| Control -replicate1            | 3,180             |
| Control -replicate2            | 2,217             |
| Control -replicate3            | 1,842             |
| Growth upper tail replicate1   | 968               |
| Growth upper tail replicate2   | 1,009             |
| Growth upper tail replicate3   | 946               |
| Survival upper tail replicate1 | 1,013             |
| Survival upper tail replicate2 | 951               |
| Survival upper tail replicate3 | 1,019             |
| Random F6 haploid individual   | 989               |
| S288c                          | 705               |
| YE-531                         | 1,385             |

AIL F6 population served as the control

**Supplementary Table 12.** Primers used for HRM analyses

| Name    | Sequence 5' to 3'         | Amplicon length |
|---------|---------------------------|-----------------|
| UPT20-F | TCTTTCAAGATTTTCAGCAGAAGCA | 114             |
| UPT20-R | AAAAGTTAGAGGGAGATGATGAGCA |                 |
| PRP28-F | ACCAGGATGTCACAACCCTC      | 105             |
| PRP28-R | TCATAGTTGCTCTCTTTGGACCAT  |                 |

**Supplementary Table 13.** Comparison of HRM and deep sequencing frequency estimates

| SNP | Chr | bp      | Pool       | HRM |    |    |                    | DS <sup>1</sup>    |
|-----|-----|---------|------------|-----|----|----|--------------------|--------------------|
|     |     |         |            | SS  | YY | SY | Y allele frequency | Y allele frequency |
| 1   | 4   | 949,385 | Growth     | 11  | 7  | 12 | 0.433              | 0.430              |
|     |     |         | Population | 6   | 9  | 15 | 0.550              | 0.670              |
| 2   | 2   | 228,251 | Survival   | 12  | 12 | 6  | 0.500              | 0.550              |
|     |     |         | Population | 2   | 17 | 11 | 0.750              | 0.730              |

bp, position in bp; Pool, Source of segregants; S, S288c allele; Y, YE-531 allele; HRM, Y-allele frequency estimate obtained by HRM; DS, Y-allele frequency estimate obtained by deep sequencing.

<sup>1</sup>DS frequencies directly obtained after alignment to S288c reference genome, before smoothing by LOESS.

**Supplementary Table 14.** Oligonucleotides utilized as specific deletion primers for “cassettes” constructions for transformation (for RHA)

| Name      | Sequence 5' to 3'      |
|-----------|------------------------|
| YBR001C-F | GCGCTTGTAGGAACTGTT     |
| YBR001C-R | GACGATTTAGAGTAAGGTC    |
| YGL255W-F | GCATTAGCTCGATGACTTAG   |
| YGL255W-R | CAGTCTCGGACAATAAATACGC |
| YJR154W-F | CATGTGTTGATAGCAGGTGACG |
| YJR154W-R | CTATTCTAGTACTTCCCTGCTG |
| YLL061W-F | GATGCCAGGAAATAAATGCG   |
| YLL061W-R | GAATGATATTCTAGGCCCTG   |
| YNL218W-F | GACATTCAATCATCGGTTGC   |
| YNL218W-R | CAATGCCGCGTCTACAATTC   |
| YGL252C-F | GAATGCCGAGATAGGATAAC   |
| YGL252C-R | CACCTTCTTGTTGTTCAAAC   |
| YMR303C-F | GCTATAGCATGCCTATCAC    |
| YMR303C-R | TCACTCGTGCTAGCAAAC     |
| YJR074W-F | GGACTGACTCCTTCATCGC    |
| YJR074W-R | CACTTTCTTCGCTGCTGG     |

Deletion KanMX “cassettes” were constructed using PCR reactions for the BY4741 deletion strains, with primers designed (50-250) bp upstream and downstream each candidate ORF. The reaction was made to extend the specific ORF homology to enable mitotic recombination of the gene disruption cassette. F, forward primers; R, reverse primers.

**Supplementary Table 15.** Specific primers that were used for deletion strain confirmation (for RHA)

| Name                        | Sequence 5' to 3'    |
|-----------------------------|----------------------|
| KanMX+ (used for all tests) | GCGCTTGTAGGAACTGTT   |
| YBR001C-CheckR              | TCAAGTTGTGTAAAGGCTC  |
| YGL255W- CheckR             | CAAGTGGTACCAGAATACG  |
| YJR154W-CheckR              | GGTGTGTCTGATACTCCTGC |
| YLL061W-CheckR              | GCACGTCCAGGTTCTGTGAC |
| YNL218W- CheckR             | AGATAATCAAGGATCCACC  |
| YGL252C-CheckR              | GTTTAAGCACCGATGATACC |
| YMR303C- CheckR             | GAGACGATTTCAGAGGAGCA |
| YJR074W- CheckR             | CGAATATCATCAACCTCCTG |

Selected colonies after “cassette” transformation were further verified by PCR for correct replacement of the gene with KanMX. PCR was performed using internal and external primers to the cassette. The internal forward primer was KanMX+, for all tests; the external reverse primer was CheckR, which is specific to each site. Appearance of PCR products of the expected size proved the correct replacement of the gene with KanMX.

## **Supplementary Text**

### **1. Control group**

SDP is typically implemented by selection of alternative tail groups from the overall phenotypic distribution of the mapping population. For survival, selection of the tolerance tail is achieved simply by exposing the population to the selective agent (ethanol in our case), and retaining survivors. Selection of the susceptible tail for survival, however, is technically complex since individuals that do not survive cannot be used to produce progeny; and non-survivors may also include numerous genes affecting normal cell function. Therefore, as suggested by Lebowitz et al., 1987 (Lebowitz et al., 1987), we took aliquots from the unselected AIL F6 population (more than  $3.5 \times 10^5$  segregants/cc), to serve as the control group.

### **2. Preparation of DNA samples**

Genomic DNA from founder strains and pools was extracted with MasterPure yeast DNA purification kit (Epicenter, Madison, WI), according to the manufacturer's instructions.

We performed whole genome deep sequencing of three DNA pools for each tail of each trait (total 6 tail pools; 30 segregants per pool). Thus, for each marker, three independent estimates of allele frequency (each based on pools of 30 segregants) were obtained for each trait.

For DNA extraction, for each of the 6 tail pools 3 subgroups were formed, each composed of 10 segregants. Based on OD600 nm absorption, an equal number of cells was taken from each segregant. Cells of the ten segregants of the subgroup were pooled together, and DNA was extracted. After extraction, equal DNA amounts of the 3 subgroups were pooled, representing the 30 individual segregants in each pool. For each of the three controls, DNA was extracted from an aliquot taken from an unselected AIL-F6 culture with cell density of 10 OD600 nm.

### **3. Confirmation of pool frequency estimates**

Pool frequency estimates of two SNPs: on chromosome 2 position 228,251, and on chromosome 4 position 949,385, were confirmed by real time PCR coupled to high resolution melting (HRM) genotyping (Sean Taylor, 2010) (Supplementary Figure 11). Thirty individuals randomly chosen from the general AIL F6 population were genotyped for both SNPs, along with two groups of 30 individuals from each of the tail pools of growth and survival. DNA of the tested strains was extracted for each individual and diluted into equal concentration of 100ng/ml. Amplification was performed using Eco real-Time PCR system (Illumina) in 3 replicates for each strain. Amplification reaction consisted of 1µl DNA, 0.2µl of 10µM of forward and reverse primers (Supplementary Table 12), 5 µl reaction mix (FastSYBER green master mix, Applied Biosystems), 3.6 µl ddH<sub>2</sub>O. Analyses were done by Eco version 4 software. SNP frequency was calculated for each group and compared to that obtained by deep f

The correlation between HRM and SDP sequencing for these markers was high ( $r = 0.891$ , Supplementary Table 13).

#### 4. Variance estimation

As the three replicate pools in each tail consisted of 30 diploid segregants each, the number of chromosomes per tail pool was 60, and the expected variance among replicate pools would be  $pq/60$ , where  $p$  is the frequency of the YE-531 allele and  $q = 1-p$ . Taking a maximum value of  $pq = 0.25$ , we expect variance among replicate pools = 0.0042. In reality, for most of the SNPs  $pq < 0.25$  (Supplementary Table 2).

#### 5. Schweder-Spjotvoll plot

Values of  $1-P_i$  after LOESS smoothing were sorted in ascending order for each trait. Then,  $R_i/n_M$ , the rank number of the  $i^{\text{th}}$  marker divided by the total number of marker tests ( $n_M$ ), was plotted against the sorted  $1-P_i$  values.

#### 6. An example for allele substitution effect calculation

The frequencies of the YE-531 allele in marker ref[NC\_001134] was 0.696 and 0.594 in the pools of the selected survival tail and the entire F6 population, respectively; the estimated frequencies of the homozygotes in the two groups were calculated as the squares of these values, 0.485 and 0.353, respectively. The frequencies of the S228c allele were calculated as 1 minus 0.696 and 1 minus 0.594, respectively, and homozygotes were estimated accordingly. The mean growth frequency values were 0.923 and 0.691 in the selected and the entire F6 populations. The weighted means of the YE-531 homozygotes across both groups was thus calculated as  $(0.485 \times 0.923 + 0.353 \times 0.691) / (0.485 + 0.353) = 0.825$ , and the weighted mean of the S228c allele was calculated similarly; the difference between the two homozygote groups was calculated as  $d = 0.825 - 0.774 = 0.051$ ; the selection intensity was  $i_{p/2} = 1.343$ , thus  $\delta = d/1.343 = 0.028$ .

#### 7. Reciprocal Hemizyosity Analysis

For RHA (Steinmetz et al., 2002), deletions were made in the S288c and YE-531 haploid backgrounds, using the strategy of Yeast Deletion Project ([http://www-sequence.stanford.edu/group/yeast\\_deletion\\_project/project\\_desc.html](http://www-sequence.stanford.edu/group/yeast_deletion_project/project_desc.html)), based on the deletion strain collection (EUROSCARF). Deletion KanMX "cassettes" were constructed using PCR reactions for the BY4741 deletion strains, with primers designed 50-250 bp upstream and downstream of each candidate ORF (Supplementary Table 14). Selection for transformants was made on agar plates with G418 (Geneticin). Selected colonies were further verified by PCR (Supplementary Table 15). Reciprocal strains were generated by crossing the deletion parental with the other parental strain.

To determine whether one allele is advantageous over the other in the RHA tests, we tested growth and survival of the two reciprocal deletion strains under ethanol stress, as in the second stage of the pool construction. We tested 6 genes for a single trait only (growth or survival), and 2 genes for both traits, making a total of 10 gene x trait tests. Each deletion strain was tested in 2 - 5 "batches", each batch consisting of four replicates. For growth, the performance of the strain under 9.5-11 % ethanol was taken as the mean OD600 nm across the replicates and batches. For survival, each replicate was graded under 18% or 19% ethanol. All candidate genes were first tested under the ethanol concentrations

originally used (9.5% for growth and 19% for survival) to evaluate the F6 phenotypic abilities. Since only a single candidate gene was tested in the F1 background, unlike the tests performed in the F6, in some cases several more batches under slightly higher/lower ethanol concentrations were performed to detect differences between alternative alleles. The performance of the deletion strain was taken as the sum of grades across replicates and batches. Grade for a replicate was assigned as follows. Each replicate was tested at five 10-fold dilutions, giving a total of 6 dilutions (including 0 dilution); and each dilution was scored 0 (no growth) to 3 (full growth) by a visual inspection. The grade for the replicate was the simple sum of the dilution scores.

For example, Gene YNL218W deletion strain S288c- $\Delta$ ::kanMX/YE-531 was graded in four batches. For Batch 1, Replicate 1, results were: Dilution 0, score 2; Dilution 1, score 2; Dilution 2, score 1; Dilution 3, score 1; Dilution 4 and 5, score 0. Total score: 6. Replicates 2, 3 and 4 had total scores 5, 7, 7, respectively, giving the grade 25 for Batch 1. In the same way, we obtained scores, 19, 19, 40 for Batches 2, 3, 4, for the grade 103 for S288c- $\Delta$ ::kanMX/YE-531 deletion of the gene YNL218W. The average value was then calculated as the grade divided by the number of observations (103/96).

A two-way ANOVA (R aov) with batch and allele as main effects was used to test the null hypothesis of equal growth of the alternative deletion strains. A Non-parametric ANCOVA (Young and Bowman, 1995) test was used to test the null hypothesis of equal slopes obtained from regressing survival scores on serial dilutions.

For the significance of the overall hypothesis that effects on ethanol tolerance of alternative alleles at single genes as obtained by QTL mapping procedures, are validated by the RHA analyses, we used a nonparametric sign test to test the null hypothesis that the favorable allele identified by QTL mapping and the favorable allele identified by RHA are independent. To do this we compared the favorable allele by QTL mapping and favorable allele by RHA for each of 10 gene x trait combinations. Results of all three analyses are shown in Supplementary Table 9.

## **8. Ethanol production assay**

Incubation of 200 ml final volume, of  $10^7$  cells/ml yeast cells suspended in ground degraded corn prepared following (Bothast and Schlicher, 2005), was in 250 ml Erlenmeyer flasks at 32.5°C under constant agitation (160rpm). After 17 hr of incubation, ethanol levels of the sample supernatant (after centrifugation at 3000 g x 2 min to remove solids) and of reference ethanol standards (European Reference Materials) were quantified using Thermo Scientific Trace 1300 gas chromatograph with flame ionization detector. Glucose levels were quantified using glucose (HK) assay kit (Sigma Aldrich) initially and after 17 hr.

## **9. Recombination blocks in a single randomly chosen F6 individual**

The mapping based on pool analysis uncovered relatively narrow QTLs that we attribute to multiple recombinations accumulated during the 6 AIL generations. However, the mapped QTLs obtained by pool analysis do not represent the distribution of the size of recombination blocks of the individual segregants formed by AIL. To evaluate this, a single

F6 haploid segregant, Line-8, was sequenced (Supplementary Figure 9). A total of 210 blocks were found across this individual genome, with a median length of about 16.1 Kb. More than 30% of the blocks were smaller than 5 Kb (Supplementary Table 10). These results are in accord with the obtained narrow QTL. As expected, the narrow width of Line-8 blocks, confirms the efficacy of the AIL design in generating narrow haplotype blocks that increase mapping resolution, and supports the use of a 1 log drop interval to define QTL boundaries.

## References

- Bahalul, M., Kaneti, G., and Kashi, Y. (2010). Ether-zymolyase ascospore isolation procedure: an efficient protocol for ascospores isolation in *Saccharomyces cerevisiae* yeast. *Yeast* 27(12), 999-1003. doi: 10.1002/yea.1808.
- Bothast, R.J., and Schlicher, M.A. (2005). Biotechnological processes for conversion of corn into ethanol. *Appl Microbiol Biotechnol* 67(1), 19-25. doi: 10.1007/s00253-004-1819-8.
- Darvasi, A., and Soller, M. (1995). Advanced intercross lines, an experimental population for fine genetic mapping. *Genetics* 141(3), 1199-1207.
- Ezov, T.K., Boger-Nadjar, E., Frenkel, Z., Katsperovski, I., Kemeny, S., Nevo, E., et al. (2006). Molecular-genetic biodiversity in a natural population of the yeast *Saccharomyces cerevisiae* from "Evolution Canyon": microsatellite polymorphism, ploidy and controversial sexual status. *Genetics* 174(3), 1455-1468. doi: 10.1534/genetics.106.062745.
- Lebowitz, R.J., Soller, M., and Beckmann, J.S. (1987). Trait-based analyses for the detection of linkage between marker loci and quantitative trait loci in crosses between inbred lines. *Theoretical and Applied Genetics* 73(4), 556-562. doi: 10.1007/bf00289194.
- Lipkin, E., Strillacci, M.G., Eitam, H., Yishay, M., Schiavini, F., Soller, M., et al. (2016). The Use of Kosher Phenotyping for Mapping QTL Affecting Susceptibility to Bovine Respiratory Disease. *PLoS ONE* 11(4), e0153423. doi: 10.1371/journal.pone.0153423.
- Sean Taylor, R.S., Richard Kurts, Carl Fisher, Viresh Patel and Frank Bizouarn (2010). "A Practical Guide To High Resolution Melt Analysis Genotyping", in: *Hercules CA*. (ed.) B.-R. Laboratories. (Bulletin).
- Spjotvoll, T.S.E. (1982). Plots of P-values to evaluate many tests simultaneously. *Biometrika* 69(3), 493-502.
- Steinmetz, L.M., Sinha, H., Richards, D.R., Spiegelman, J.I., Oefner, P.J., McCusker, J.H., et al. (2002). Dissecting the architecture of a quantitative trait locus in yeast. *Nature* 416(6878), 326-330. doi: 10.1038/416326a.
- Young, S.G., and Bowman, A.W. (1995). Non-Parametric Analysis of Covariance. *Biometrics* 51(3), 920-931. doi: 10.2307/2532993.
